# Supplementary material
Source: PubMed Central journal article supplement (PMC5953367)
Supplement: tpmd170653.SD1.pdf [file tpmd170653.SD1.pdf]

## DBS RNA Extraction Testing Flowchart

1. Test different DBS punch sizes and two sample disruption methods
  - A. Homogenizer disruption method: one 6 mm punch, one full DBS
  - B. Incubation and agitation method: one 6 mm punch, one full DBS

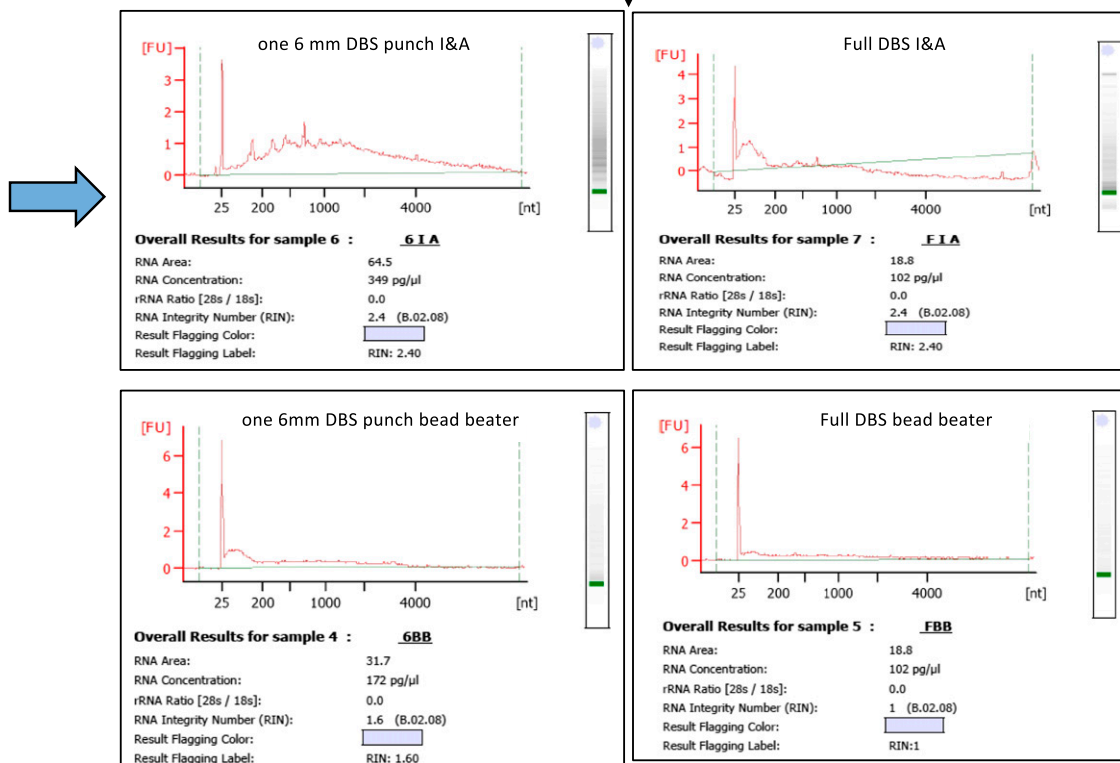

The blue arrow indicates the condition that provided the optimal results in this experiment. (Clockwise from top left): This image indicates a tube containing one 6 mm punch that was homogenized using a 1-hour incubation at room temperature with vortexing for 30 seconds every 15 minutes. The top right image indicates a full DBS that underwent the same method. The bottom right image indicates a full DBS that was homogenized using a bead beater. The sample was “beat” twice consecutively for 30 seconds at the highest setting. The bottom left image shows one 6 mm punch that was homogenized using the bead beater method. All samples were homogenized in 350 μL lysis buffer with 3.5 μL beta-mercaptoethanol. This set of conditions was determined to be most optimal based on both the Agilent image above and the NanoDrop concentration.

SUPPLEMENTAL FIGURE 1. Optimization of RNA extraction and purification steps from dried blood spots (DBS). ID numbers on the Agilent graphs were the IDs used during research and development.

2. Test optimal number of 6 mm punches per extraction tube, using optimal sample disruption method from Test 1
- A. Two tubes with one 6 mm punch each, pooled after sample disruption
  - B. Three tubes with two 6 mm punches each, pooled after sample disruption

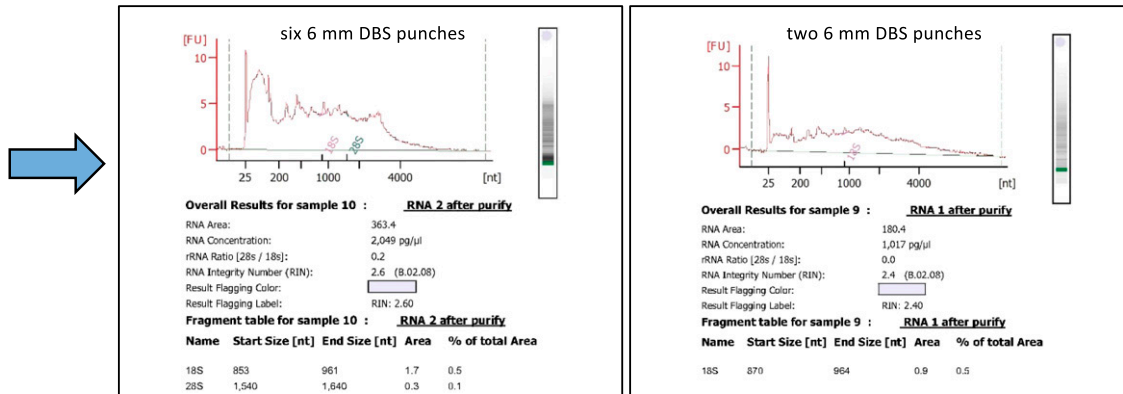

The blue arrow indicates the condition that provided the optimal results in this experiment. The left image indicates a tube that contained six 6 mm punches that were homogenized in three different tubes (each containing two punches) and then pooled into one tube after homogenization for the RNA isolation. The right image indicates a tube that contained two 6 mm punches that were homogenized individually and then pooled for the RNA isolation procedure. All samples were homogenized using the incubation and agitation method as described in the previous experiment. This set of conditions was determined to be most optimal based on both the Agilent image above and the NanoDrop concentration.

SUPPLEMENTAL FIGURE 1. (Continued)

3. Test optimal RNA extraction method  
 A. Three 3 mm punches using Rneasy Micro Kit (QIAGEN)  
 B. Three 3 mm punches using Illustra Kit (GE Healthcare)

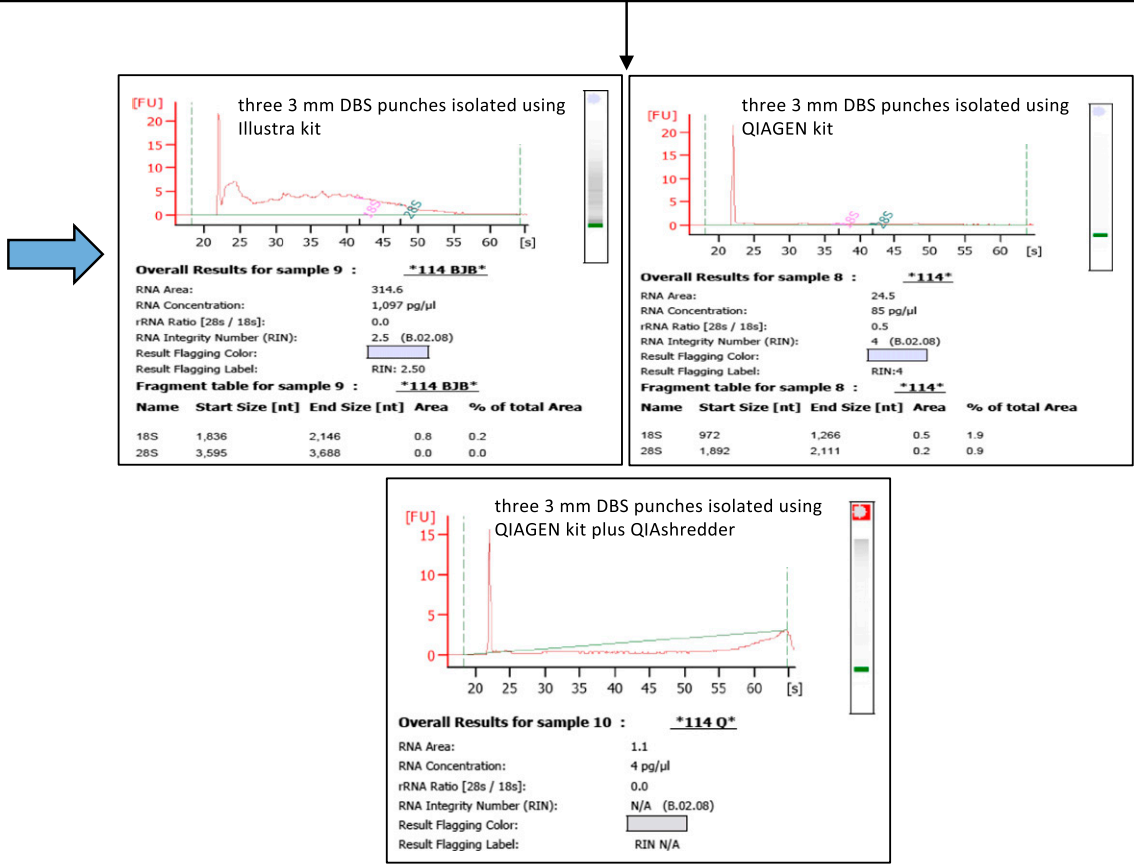

The blue arrow indicates the condition that provided the optimal results in this experiment. The top left image indicates three 3 mm DBS punches extracted using the Illustra RNA Isolation Kit (GE Healthcare). The top right image was three 3 mm DBS punches extracted using the RNeasy micro kit (QIAGEN), and the bottom image was three 3 mm DBS punches extracted using the RNeasy micro kit (QIAGEN), in addition to a pass through a QIAshredder column. All tubes were homogenized using the incubation and agitation method as described in experiment 1. This set of conditions was determined to be most optimal based on both the Agilent image above and the NanoDrop concentration.

4. Test bead beater sample disruption method
- A. Three 3 mm punches in bead beater 30 seconds at max speed (5 m/s)
  - B. Three 3 mm punches in bead beater 60 seconds at max speed (5 m/s)

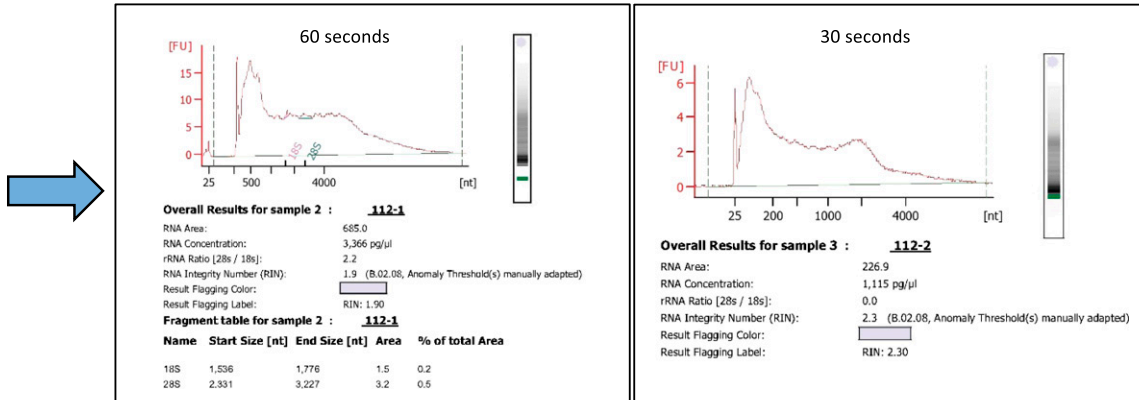

The blue arrow indicates the condition that provided the optimal results in this experiment. The image on the left indicates a tube with DBS that was homogenized using the Bead Mill 4 Bead Beater (Fisher Scientific) for 60 seconds, and the image on the right indicates a tube with DBS was homogenized using the Bead Mill 4 Bead Beater for 30 seconds. All tubes contained three 3 mm punches from the same patient, and were homogenized in a solution of 350 μL lysis buffer and 35 μL beta-mercaptoethanol. This set of conditions was determined to be most optimal based on both the Agilent image above and the NanoDrop concentration.

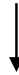

SUPPLEMENTAL FIGURE 1. (Continued)

5. Determination of optimal bead beater speed for disruption

- A. Three 3 mm punches in bead beater 60 seconds at minimum speed (1 m/s)
- B. Three 3 mm punches in bead beater 60 seconds at medium speed (3 m/s)
- C. Three 3 mm punches in bead beater 60 seconds at maximum speed (5 m/s)

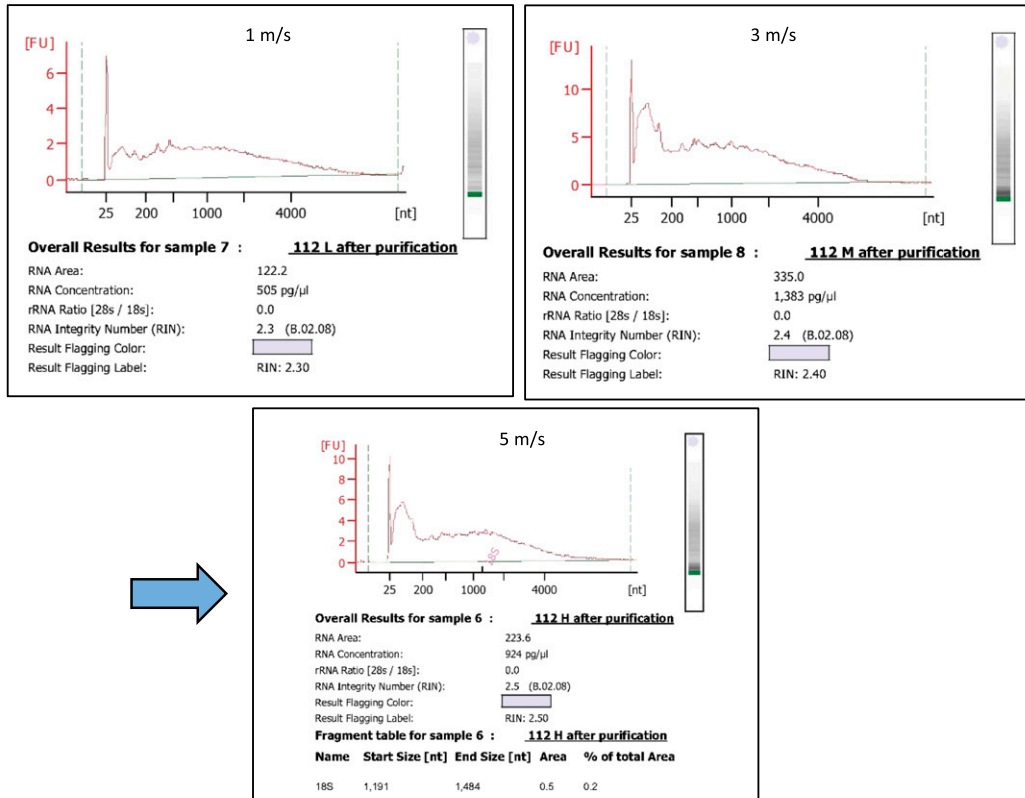

The blue arrow indicates the condition that provided the optimal results in this experiment. All tubes contained three 3 mm punches from the same patient. The punches were homogenized in tubes also containing 350 μL lysis buffer and 3.5 μL beta-mercaptoethanol. This set of conditions was determined to be most optimal based on both the Agilent image above and the NanoDrop concentration.

SUPPLEMENTAL FIGURE 1. (Continued)

6. Test optimal number of 3 mm punches per tube using optimal bead beater speed and time
- A. Three 3 mm punches
  - B. Five 3 mm punches
  - C. Eight 3 mm punches

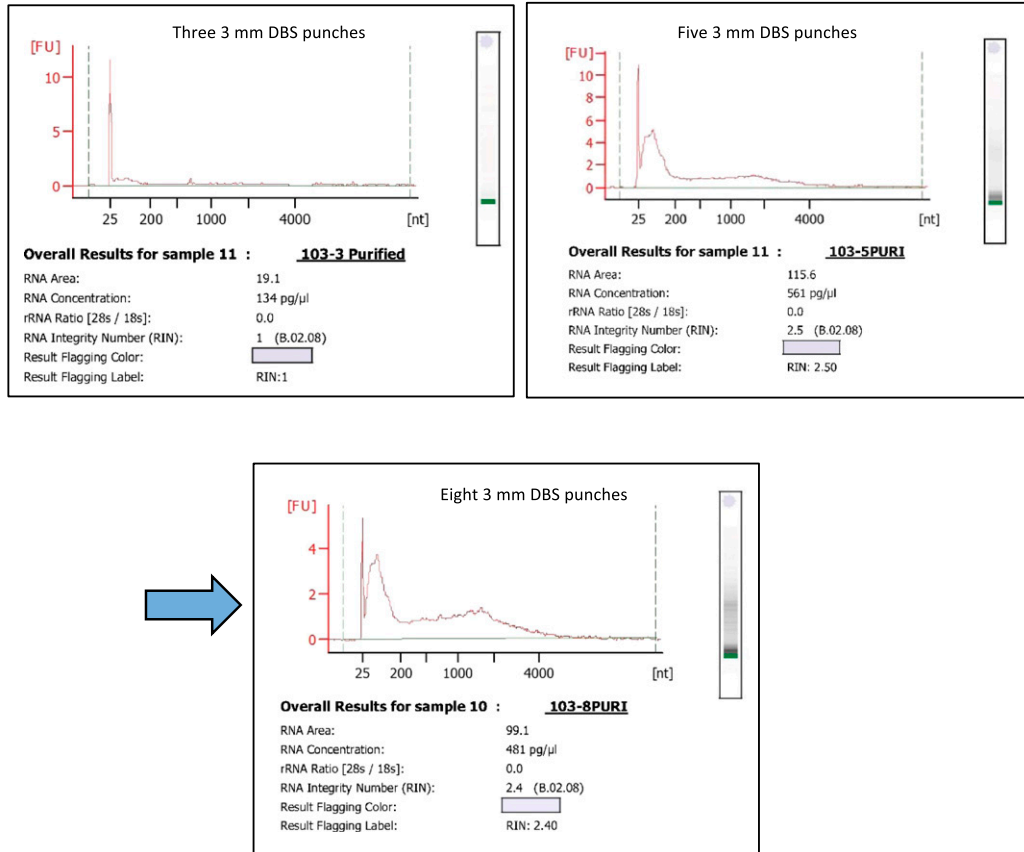

The blue arrow indicates the condition that provided the optimal results in this experiment. The optimal number of 3 mm punches proved to be eight in one tube. All tubes in this experiment were homogenized using the Bead Mill 4 bead beater for 60 seconds at 5 m/s in 350 μL lysis buffer and 3.5 μL beta-mercaptoethanol. This set of conditions was determined to be most optimal based on both the Agilent image above and the NanoDrop concentration.

SUPPLEMENTAL FIGURE 1. (Continued)

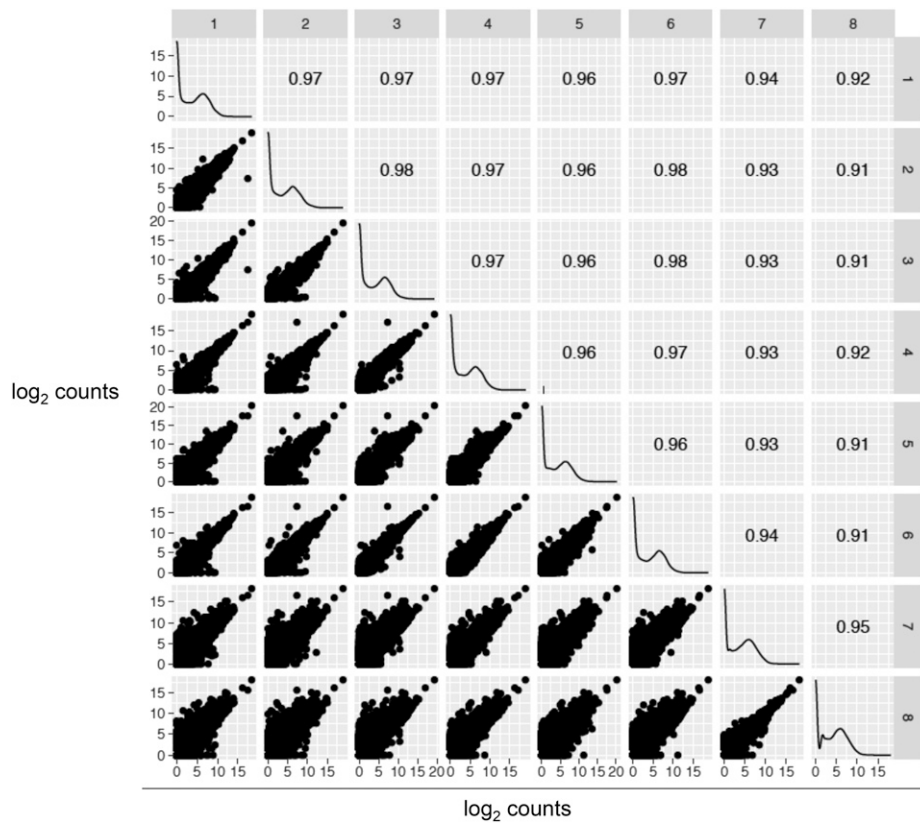

SUPPLEMENTAL FIGURE 2. Inter-sample correlations for Tempus tube transcriptomes. Left-lower triangular entries are scatter plots of  $\log_2$  counts for each pair of eight samples and upper triangular entries are Spearman correlations of  $\log_2$  counts from each pair.

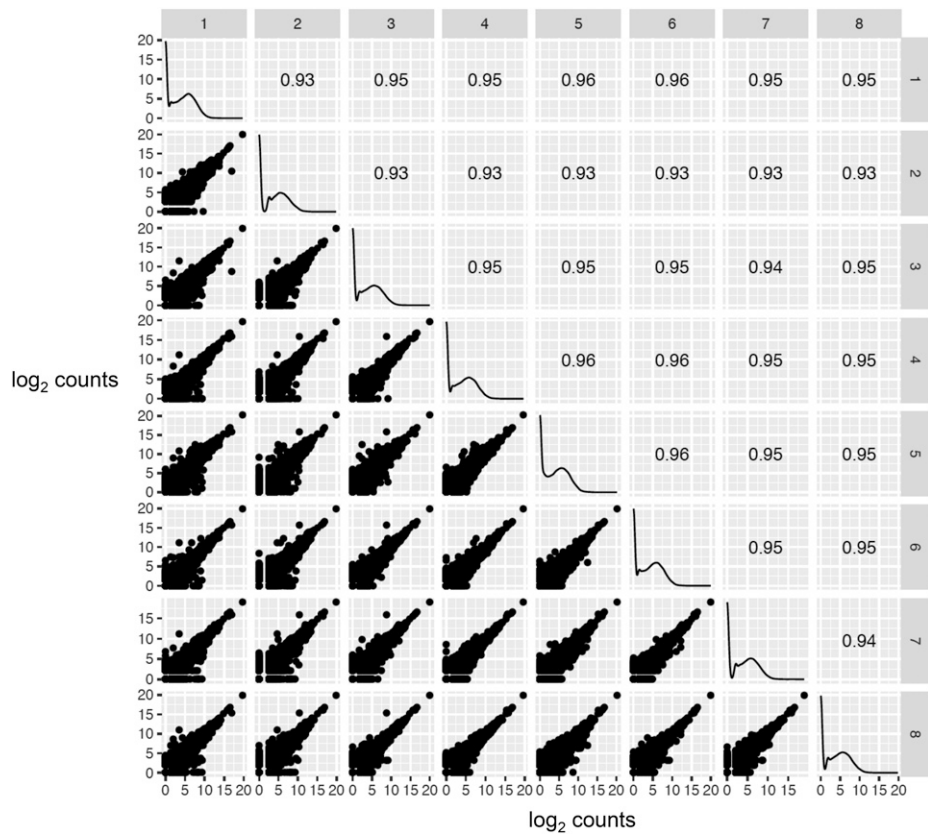

SUPPLEMENTAL FIGURE 3. Inter-person correlation for dried blood spot transcriptomes.

SUPPLEMENTAL TABLE 1

Top 1% of genes with increased counts in transcriptome from DBS RNA

| Gene ID    |
|------------|
| A2M        |
| ALS2CR12   |
| ANKRD36    |
| ANKRD36B   |
| ANKRD36BP2 |
| APLF       |
| ASPM       |
| ASTN2      |
| ATAD5      |
| BNIP3L     |
| CASC5      |
| CC2D2A     |
| CCDC141    |
| CCDC144B   |
| CCDC18     |
| CDC42BPA   |
| CDKN2B-AS1 |
| CENPE      |
| CEP57L1    |
| CLEC4GP1   |
| CNTLN      |
| DDI2       |
| DNAJC6     |
| DOK6       |
| EFCAB13    |
| EGR1       |
| EGR3       |
| ERCC6L2    |
| FAM46C     |
| FOS        |
| FOSB       |
| GSG2       |
| GYPA       |
| HELB       |
| HEMGN      |
| HIST1H1E   |
| KCNQ1OT1   |
| KIF14      |
| KIF20B     |
| LNPEP      |
| MAB21L3    |
| MALAT1     |
| MAN1A2     |
| MBNL1-AS1  |
| MBNL3      |
| MPP6       |
| MTMR12     |
| MTRNR2L1   |
| MTRNR2L10  |
| MTRNR2L2   |
| MTRNR2L3   |
| MTRNR2L4   |
| MTRNR2L6   |
| MTRNR2L8   |
| NBEAL1     |
| NEIL3      |
| NR4A2      |
| NRSN1      |
| NUSAP1     |
| ORC4       |
| PGM5P2     |
| PGPEP1     |
| PTGS2      |
| PZP        |
| RMRP       |
| RPPH1      |
| SCARNA10   |
| SCARNA17   |

SUPPLEMENTAL TABLE 1

Continued

| Gene ID   |
|-----------|
| SCARNA2   |
| SCARNA21  |
| SCARNA7   |
| SHISA9    |
| SLITRK4   |
| SOX6      |
| SPECC1    |
| SSTR5-AS1 |
| STIL      |
| SWT1      |
| TBCEL     |
| TCP11L2   |
| TMEM212   |
| TPM4      |
| TTN       |
| UGDH-AS1  |
| UGT8      |
| VRK1      |
| YOD1      |
| ZBED6     |
| ZNF460    |
| ZNF471    |

DBS = dried blood spot.

(continued)



SUPPLEMENTAL TABLE 2

Top 1% of genes with increased counts in transcriptome from whole blood Tempus RNA

---

ACAP3  
 APOBR  
 ARHGDI1A  
 ATN1  
 BAX  
 C11orf68  
 C16orf13  
 CD7  
 CDK10  
 CDK2AP2  
 CIRBP  
 CORO1B  
 DBP  
 DENND1C  
 DMPK  
 DYRK1B  
 ENGASE  
 ERF  
 FBRSL1  
 GLTSCR1  
 GPAA1  
 GPBAR1  
 HAPLN3  
 HDAC10  
 IDUA  
 IFITM3  
 IGFLR1  
 KLF16  
 LENG8  
 LRCH4  
 LSM10  
 LSP1  
 LTBP3  
 LTBP4  
 LY6E  
 MAP1S  
 MAP3K10  
 MAPK3  
 MBD6  
 MEN1  
 MIB2  
 MLLT1  
 MMP9  
 NCDN  
 NDUFS7  
 NPDC1  
 OGFR  
 OLIG1  
 OSCAR  
 PRAM1  
 PRKCSH  
 PTP4A3  
 RAD9A  
 RFNG  
 RHPN1  
 RPS16  
 SAMD1  
 SAP25  
 SCAF1  
 SF3A2  
 SGSH  
 SH2B1  
 SH3BP1  
 SIGIRR  
 SLC39A13  
 SLC52A2  
 SPI1  
 SRM  
 STMN3  
 STUB1

---

SUPPLEMENTAL TABLE 2

Continued

---

TAF1C  
 TBKBP1  
 TEO2  
 TGFB1  
 TMEM134  
 TMUB1  
 TNFSF12  
 TNK2  
 VAMP1  
 WAS  
 ZDHHC8  
 ZFPM1  
 ZNF385A  
 ZNF444  
 ZNF467  
 ZNF524  
 ZNF580  
 ZYX

---

(continued)
